# Supplementary material
Source: PubMed Central journal article supplement (PMC8285496)
Supplement: 41401_2020_559_MOESM1_ESM.pdf [file 41401_2020_559_MOESM1_ESM.pdf]

Supplementary Fig. 1

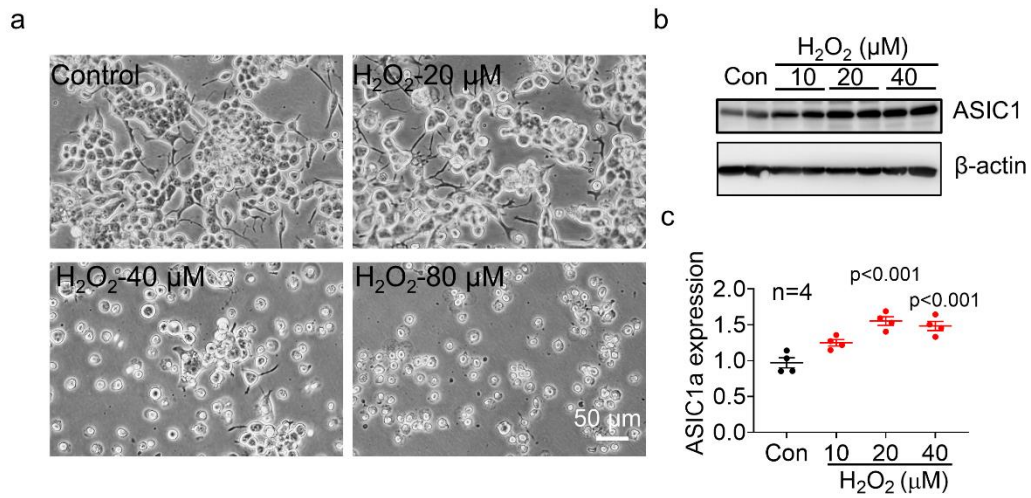

**Supplementary Fig 1. Concentration-dependent effect of H<sub>2</sub>O<sub>2</sub> on ASIC1a protein expression in NS20Y cells.** **a** Representative images show the morphological change of NS20Y cells with or without different concentrations of H<sub>2</sub>O<sub>2</sub> (20, 40 and 80 μM) treatment for 24h. **b** Representative blots and **c** quantification of ASIC1a protein expression with or without the treatment of H<sub>2</sub>O<sub>2</sub> (10, 20 and 40 μM) in NS20Y cells (n=4, *p*<0.001 versus control, one-way ANOVA).

Supplementary Fig. 2

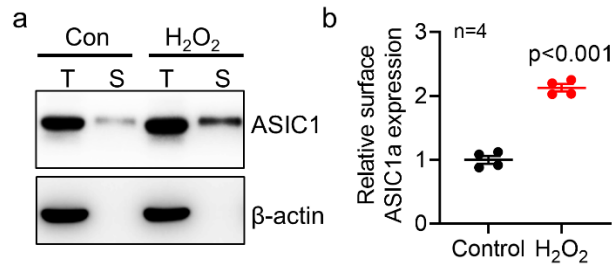

**Supplementary Fig 2. Effect of H<sub>2</sub>O<sub>2</sub> on surface ASIC1a protein expression in NS20Y cells.**

**a**, Representative blots showing the total (T) and surface (S) ASIC1a protein expression with or without 20 μM H<sub>2</sub>O<sub>2</sub> treatment for 24h. **b**, summary data showing the relative surface ASIC1a expression. Results are expressed as the mean ± SEM. Unpaired Student t-test was used for statistical analysis.

Supplementary Fig. 3

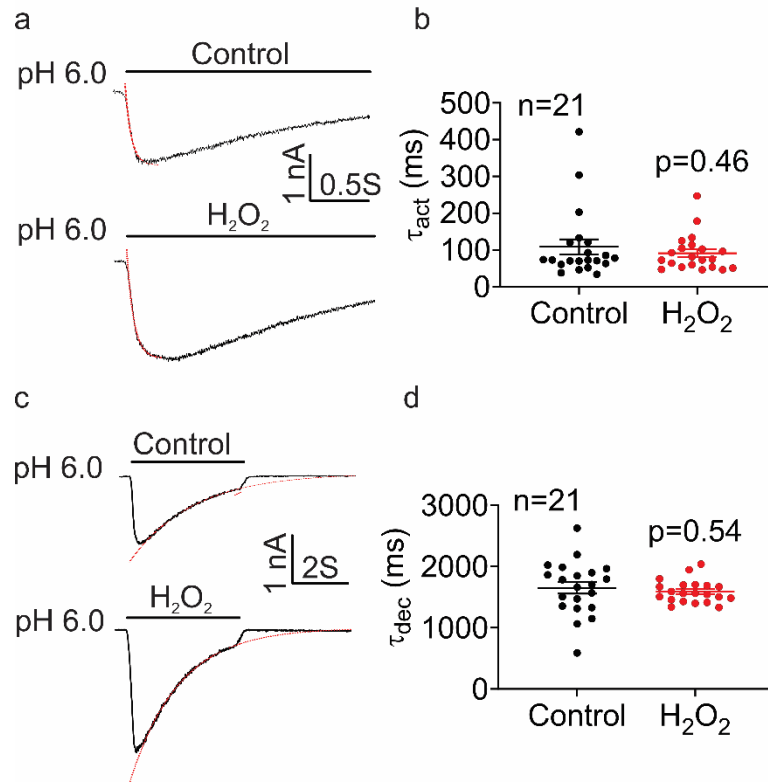

**Supplementary Fig 3. Effect of H<sub>2</sub>O<sub>2</sub> on the kinetics of ASIC currents in NS20Y cells. a** Representative fitted current traces and **b** summary data showing the activation kinetics of the ASIC currents with or without H<sub>2</sub>O<sub>2</sub> treatment for 24h. The time constants of activation ( $\tau_{act}$ ) were  $108 \pm 21$  for control and  $91 \pm 11$  ms for H<sub>2</sub>O<sub>2</sub> (n=21 cells,  $p=0.46$ , unpaired Student's *t* test). **c** Representative fitted current traces and **d** summary data showing the desensitization kinetics of the ASIC currents with or without H<sub>2</sub>O<sub>2</sub> treatment for 24h. The time constants of desensitization ( $\tau_{dec}$ ) were  $1652 \pm 96$  and  $1588 \pm 40$  ms for control and H<sub>2</sub>O<sub>2</sub>, respectively (n=21 cells,  $p=0.54$ , unpaired Student's *t* test). Time constants were determined using standard exponential fit.

Supplementary Fig. 4

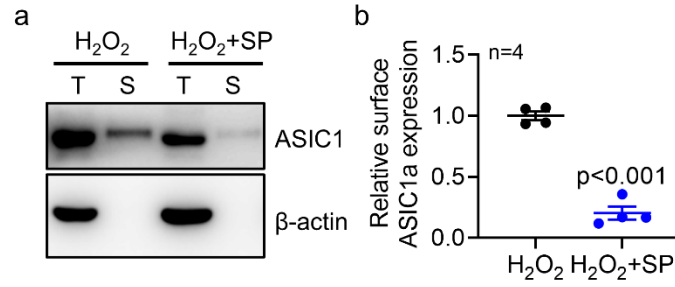

**Supplementary Fig 4. Effect of SP600125 on H<sub>2</sub>O<sub>2</sub> induced surface ASIC1a protein expression in NS20Y cells.** **a**, Representative blots showing the total (T) and surface (S) ASIC1a protein expression with or without 20 μM H<sub>2</sub>O<sub>2</sub> treatment for 24h. **b**, Summary data showing the relative surface ASIC1a expression. Results are expressed as the mean ± SEM. Unpaired Student t-test was used for statistical analysis.

Supplementary Fig. 5

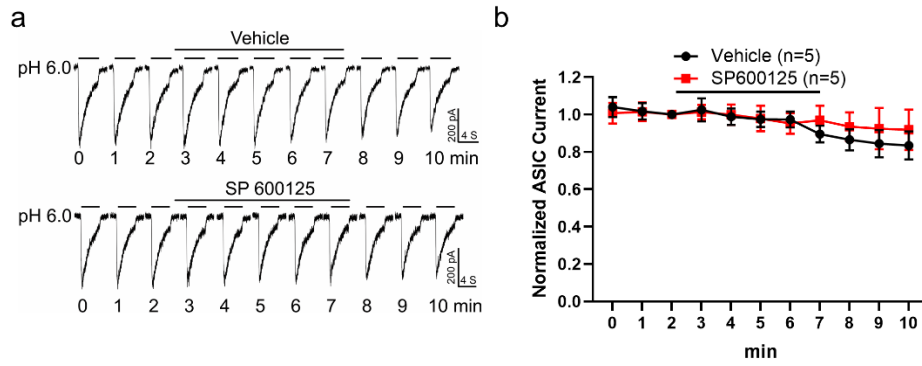

**Supplementary Fig 5. Acute effect of SP600125 on ASIC currents in NS20Y cells. a** Representative recordings of ASIC currents and **b** summary data showing the lack of effect of acute perfusion of SP600125 (10  $\mu$ M, 5 min) on ASIC currents in NS-20Y cells (n=5 cells, two-way ANOVA).

Supplementary Fig. 6

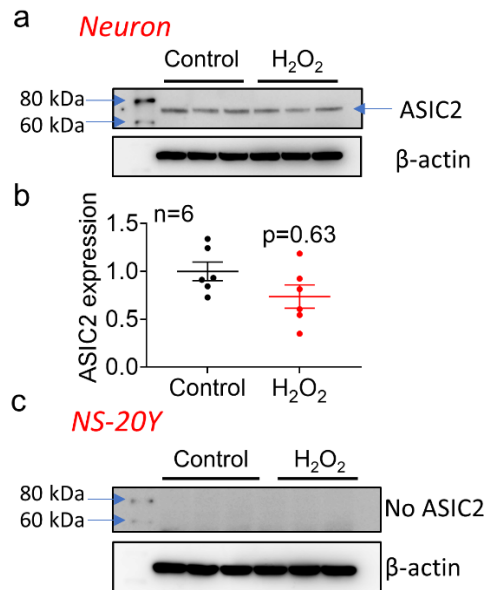

**Supplementary Fig 6. Effect of H<sub>2</sub>O<sub>2</sub> on ASIC2 expression.** **a** Representative blots and **b** quantification of ASIC2 protein expression in primary cultured cortical neurons, with or without H<sub>2</sub>O<sub>2</sub> (20 μM) treatment for 24 h (n=6, unpaired Student's *t* test). **c** Representative blots showing no expression of ASIC2 protein in NS20Y cells.
